# Supplementary material for: Protein quality of oat-pea-based yoghurt alternatives produced using pulsed electric field treatment and probiotic starter cultures
Source: Royal Society of Chemistry journal article supplement (doi:10.1039/d5fo03360h), 2025-01-01
Supplement: d5fo03360h1.xlsx [file d5fo03360h1.xlsx]

## Sheet: Intestinal protein IVPD
Intestinal digestion time	Sample	protein digestibility (%)
0	Lp299v	18.7049
20	Lp299v	28.4099
30	Lp299v	29.952
40	Lp299v	37.2121
60	Lp299v	44.2238
90	Lp299v	46.9386
120	Lp299v	50.8003
180	Lp299v	54.5335
240	Lp299v	54.4512
0	Lp299v	18.6852
20	Lp299v	33.7322
30	Lp299v	32.7926
40	Lp299v	40.0474
60	Lp299v	45.0954
90	Lp299v	50.5583
120	Lp299v	54.9806
180	Lp299v	58.454
240	Lp299v	58.5378
0	Lp299v	16.719
20	Lp299v	28.0162
30	Lp299v	31.9032
40	Lp299v	37.3477
60	Lp299v	41.5633
90	Lp299v	47.5815
120	Lp299v	50.7461
180	Lp299v	54.8257
240	Lp299v	55.5787
0	Oat milk	14.6284
20	Oat milk	24.5307
30	Oat milk	28.7213
40	Oat milk	33.4029
60	Oat milk	37.2934
90	Oat milk	42.4007
120	Oat milk	52.5953
180	Oat milk	54.0598
240	Oat milk	50.7483
0	Oat milk	12.0524
20	Oat milk	22.0385
30	Oat milk	34.1932
40	Oat milk	38.9606
60	Oat milk	40.9364
90	Oat milk	46.0461
120	Oat milk	47.7055
180	Oat milk	49.4633
240	Oat milk	50.3063
0	Oat milk	14.444
20	Oat milk	25.9099
30	Oat milk	29.6965
40	Oat milk	33.2601
60	Oat milk	37.7086
90	Oat milk	39.0323
120	Oat milk	41.3795
180	Oat milk	42.5121
240	Oat milk	43.4319
0	Lpbp431	21.3609
20	Lpbp431	35.055
30	Lpbp431	39.3109
40	Lpbp431	38.299
60	Lpbp431	46.9917
90	Lpbp431	47.5483
120	Lpbp431	57.4722
180	Lpbp431	57.8776
240	Lpbp431	56.0593
0	Lpbp431	15.2456
20	Lpbp431	37.1677
30	Lpbp431	39.0502
40	Lpbp431	45.8118
60	Lpbp431	47.1049
90	Lpbp431	52.3419
120	Lpbp431	50.948
180	Lpbp431	57.817
240	Lpbp431	56.6607
0	Lpbp431	30.2279
20	Lpbp431	32.0917
30	Lpbp431	36.2482
40	Lpbp431	36.4806
60	Lpbp431	40.8443
90	Lpbp431	43.6537
120	Lpbp431	46.8638
180	Lpbp431	51.4631
240	Lpbp431	51.9398
0	PEF treated OPMA	20.1643
20	PEF treated OPMA	33.0024
30	PEF treated OPMA	32.8343
40	PEF treated OPMA	39.427
60	PEF treated OPMA	47.5396
90	PEF treated OPMA	49.4347
120	PEF treated OPMA	50.8658
180	PEF treated OPMA	52.7114
240	PEF treated OPMA	52.9687
0	PEF treated OPMA	15.4172
20	PEF treated OPMA	28.3656
30	PEF treated OPMA	31.601
40	PEF treated OPMA	43.0496
60	PEF treated OPMA	41.4454
90	PEF treated OPMA	47.3025
120	PEF treated OPMA	53.2074
180	PEF treated OPMA	56.082
240	PEF treated OPMA	55.4846
0	PEF treated OPMA	17.7793
20	PEF treated OPMA	34.4926
30	PEF treated OPMA	33.1354
40	PEF treated OPMA	41.3993
60	PEF treated OPMA	41.8232
90	PEF treated OPMA	44.7048
120	PEF treated OPMA	46.4214
180	PEF treated OPMA	49.1128
240	PEF treated OPMA	48.4265
0	Pea protein isolate	13.7314
20	Pea protein isolate	26.4718
30	Pea protein isolate	26.8661
40	Pea protein isolate	37.1911
60	Pea protein isolate	43.0654
90	Pea protein isolate	46.9302
120	Pea protein isolate	45.5809
180	Pea protein isolate	48.7477
240	Pea protein isolate	47.1524
0	Pea protein isolate	13.2392
20	Pea protein isolate	27.3478
30	Pea protein isolate	35.0836
40	Pea protein isolate	41.3709
60	Pea protein isolate	45.9523
90	Pea protein isolate	49.7165
120	Pea protein isolate	48.7636
180	Pea protein isolate	50.0286
240	Pea protein isolate	52.8879
0	Pea protein isolate	14.0615
20	Pea protein isolate	29.5167
30	Pea protein isolate	32.2422
40	Pea protein isolate	38.94
60	Pea protein isolate	41.7107
90	Pea protein isolate	44.4845
120	Pea protein isolate	45.4386
180	Pea protein isolate	49.4031
240	Pea protein isolate	52.7415
0	Control (OPMA)	23.5586
20	Control (OPMA)	33.7002
30	Control (OPMA)	30.5052
40	Control (OPMA)	38.0751
60	Control (OPMA)	45.2077
90	Control (OPMA)	45.1597
120	Control (OPMA)	49.3054
180	Control (OPMA)	47.9174
240	Control (OPMA)	49.8929
0	Control (OPMA)	13.1583
20	Control (OPMA)	29.6164
30	Control (OPMA)	33.7606
40	Control (OPMA)	41.1064
60	Control (OPMA)	44.1494
90	Control (OPMA)	51.4736
120	Control (OPMA)	50.2693
180	Control (OPMA)	52.2349
240	Control (OPMA)	51.5823
0	Control (OPMA)	19.9001
20	Control (OPMA)	32.9483
30	Control (OPMA)	36.4324
40	Control (OPMA)	37.215
60	Control (OPMA)	36.8678
90	Control (OPMA)	39.4015
120	Control (OPMA)	42.1283
180	Control (OPMA)	45.1936
240	Control (OPMA)	45.3911
0	RP80	21.7245
20	RP80	33.3656
30	RP80	39.2314
40	RP80	39.1065
60	RP80	43.6936
90	RP80	48.353
120	RP80	52.4392
180	RP80	53.634
240	RP80	56.7935
0	RP80	11.3318
20	RP80	28.0679
30	RP80	31.3888
40	RP80	45.3363
60	RP80	50.3712
90	RP80	53.7402
120	RP80	57.7815
180	RP80	60.6851
240	RP80	61.5086
0	RP80	13.8169
20	RP80	31.0073
30	RP80	35.449
40	RP80	41.2546
60	RP80	46.2322
90	RP80	47.6445
120	RP80	48.985
180	RP80	51.5111
240	RP80	51.2507
0	Yo-flex	20.2467
20	Yo-flex	31.561
30	Yo-flex	33.5959
40	Yo-flex	41.378
60	Yo-flex	43.6721
90	Yo-flex	46.5973
120	Yo-flex	55.8133
180	Yo-flex	54.6086
240	Yo-flex	55.7713
0	Yo-flex	17.1172
20	Yo-flex	23.781
30	Yo-flex	31.3773
40	Yo-flex	41.301
60	Yo-flex	43.5423
90	Yo-flex	46.1031
120	Yo-flex	53.787
180	Yo-flex	52.1563
240	Yo-flex	55.9831
0	Yo-flex	17.9908
20	Yo-flex	29.0751
30	Yo-flex	38.1527
40	Yo-flex	44.3636
60	Yo-flex	47.7829
90	Yo-flex	51.7553
120	Yo-flex	49.5879
180	Yo-flex	54.1106
240	Yo-flex	51.2338

## Sheet: Gastric protein IVPD
Gastric digestion time	Sample	protein digestibility (%)
0	Lp299v	0.568454
30	Lp299v	5.01766
60	Lp299v	12.7211
120	Lp299v	10.7192
0	Lp299v	3.93009
30	Lp299v	4.20901
60	Lp299v	7.31174
120	Lp299v	11.3928
0	Lp299v	1.89173
30	Lp299v	4.70747
60	Lp299v	7.57693
120	Lp299v	11.1398
0	Oat milk	0.427966
30	Oat milk	3.81009
60	Oat milk	7.98183
120	Oat milk	11.6076
0	Oat milk	1.68341
30	Oat milk	0.976154
60	Oat milk	7.58188
120	Oat milk	9.40771
0	Oat milk	4.2318
30	Oat milk	4.09032
60	Oat milk	7.58956
120	Oat milk	10.8097
0	Lbp431	1.93604
30	Lbp432	8.74322
60	Lbp433	10.5011
120	Lbp434	13.3993
0	Lbp435	2.11132
30	Lbp436	6.07584
60	Lbp437	9.99683
120	Lbp438	11.9298
0	Lbp439	0.977679
30	Lbp440	4.16744
60	Lbp441	7.00641
120	Lbp442	10.1161
0	PEF treated OPMA	0.259498
30	PEF treated OPMA	6.14761
60	PEF treated OPMA	9.18154
120	PEF treated OPMA	10.0061
0	PEF treated OPMA	2.65495
30	PEF treated OPMA	2.72804
60	PEF treated OPMA	7.60733
120	PEF treated OPMA	8.74478
0	PEF treated OPMA	2.24397
30	PEF treated OPMA	5.39292
60	PEF treated OPMA	9.63123
120	PEF treated OPMA	12.5094
0	Pea protein isolate	1.53306
30	Pea protein isolate	5.84672
60	Pea protein isolate	7.00016
120	Pea protein isolate	7.72337
0	Pea protein isolate	1.04102
30	Pea protein isolate	1.41746
60	Pea protein isolate	6.6272
120	Pea protein isolate	6.53303
0	Pea protein isolate	0.130533
30	Pea protein isolate	2.59332
60	Pea protein isolate	4.77894
120	Pea protein isolate	7.14743
0	Control	0.506313
30	Control	5.69921
60	Control	9.90896
120	Control	10.9128
0	Control	3.43684
30	Control	5.18712
60	Control	7.70348
120	Control	11.0447
0	Control	3.9731
30	Control	5.97933
60	Control	10.6295
120	Control	14.7536
0	RP80	0.357714
30	RP81	5.43527
60	RP82	9.85612
120	RP83	9.26296
0	RP84	2.60538
30	RP85	4.73751
60	RP86	7.33838
120	RP87	11.688
0	RP88	1.82655
30	RP89	6.18889
60	RP90	9.48476
120	RP91	14.488
0	Yo-flex	0.52708
30	Yo-flex	5.29427
60	Yo-flex	8.82031
120	Yo-flex	11.5613
0	Yo-flex	3.54266
30	Yo-flex	6.56722
60	Yo-flex	8.37448
120	Yo-flex	12.9923
0	Yo-flex	0.0288326
30	Yo-flex	2.83792
60	Yo-flex	6.41804
120	Yo-flex	9.23505

## Sheet: Fermentation data
		Glucose	in g/100ml		Bacterial number		in log CFU	pH
	Time	Rep1	Rep2	Rep3	Rep1	Rep2	Rep3	Rep1	Rep2	Rep3
Lp299v	0	8.57648	8.42516	8.68152	7.11394	7.17609	7.07918	6.78	6.81	6.76
Lp299v	1	8.62005	8.79433	8.90326	7.04139	7.41497	7.30103	6.7	6.66	6.68
Lp299v	2	8.01006	8.07541	8.42398	7.60206	7.61278	7.76343	6.38	6.32	6.41
Lp299v	3	7.55256	7.87934	7.70506	8.11394	8.32222	8.34242	5.89	5.74	5.82
Lp299v	4	7.00792	7.16042	6.85543	8.75587	8.5563	8.76343	4.73	4.99	5.01
Lp299v	5	5.13437	5.11259	5.22151	8.77085	8.8451	8.77085	4.57	4.63	4.51
Lp299v	6	4.15403	4.13224	4.06688	9.04139	9.20412	9	4.38	4.35	4.33
Lp299v	7	3.4351	3.47868	3.36975	9	9	9	4.25	4.23	4.15
Lp299v	8	2.86868	2.89047	2.97761	9.17609	9	9	3.95	4.02	4.08
Yoflex	0	8.57648	8.42516	8.68152	7.25527	7.11394	7	6.78	6.81	6.76
Yoflex	1	7.13864	7.29114	7.29114	7.39794	7.34242	7.34242	6.56	6.52	6.48
Yoflex	2	6.50686	6.83364	6.81186	7.57978	7.68124	7.74036	5.78	5.81	5.84
Yoflex	3	6.70293	6.92078	6.72471	8.11394	8.07918	7.69897	5.62	5.55	5.66
Yoflex	4	6.52864	6.41972	6.26722	8.20412	8.14613	8.23045	5.32	5.38	5.4
Yoflex	5	5.96222	6.18008	6.26722	8.30103	8.43136	8.32222	5.22	5.23	5.24
Yoflex	6	5.63544	5.52651	5.5483	8.54407	8.47712	8.53148	5.07	4.98	5.06
Yoflex	7	4.85116	4.67688	4.74223	8.60206	8.69897	8.47712	4.84	4.93	4.82
Yoflex	8	4.76402	4.80759	4.82938	8.63347	8.34242	8.54407	4.75	4.65	4.81
RP80	0	8.57648	8.42516	8.68152	7.11394	7.04139	7	6.78	6.81	6.76
RP80	1	8.16256	8.22791	8.11898	7.36173	7.39794	7.30103	6.64	6.48	6.56
RP80	2	7.74863	7.77042	7.98827	7.69897	7.90309	7.60206	6.22	6.18	6.2
RP80	3	5.63544	5.67901	5.74437	8.20412	8	8.20412	5.58	5.53	5.64
RP80	4	4.17581	4.15403	4.1976	8.4624	8.54407	8.4624	5.01	4.87	4.9
RP80	5	2.8469	2.67261	2.73797	8.57978	8.47712	8.60206	4.47	4.59	4.59
RP80	6	1.1912	1.30013	1.27834	8.68124	8.59106	8.53148	4.25	4.33	4.27
RP80	7	0.494064	0.537635	0.450493	8.60206	8.30103	8.69897	4.19	4.06	4.08
RP80	8	0.210852	0.145496	0.189067	8.77815	8.77815	8.60206	4.06	4	3.99
Lbp431	0	8.57648	8.42516	8.68152	7.11394	7.20412	7.14613	6.78	6.81	6.76
Lbp431	1	7.55256	7.7922	7.83577	7.36173	7.36173	7.44716	6.58	6.49	6.54
Lbp431	2	7.33471	7.07328	7.11685	7.43136	7.57978	7.68124	6.21	6.12	6.17
Lbp431	3	6.87721	6.85543	6.76828	7.68124	7.57978	7.76343	5.96	5.91	5.99
Lbp431	4	5.91865	5.94044	5.87508	8	8.04139	8	5.3	5.24	5.37
Lbp431	5	4.87295	4.52438	4.7858	8.30103	8.38021	8.44716	4.93	5.04	4.98
Lbp431	6	3.45689	3.41332	3.32618	8.53148	8.39794	8.43136	4.66	4.72	4.62
Lbp431	7	1.67048	1.71405	1.69227	8.77815	8.60206	8.90309	4.45	4.38	4.41
Lbp431	8	0.232638	0.406922	0.276209	8.8451	8.8451	8.69897	4.32	4.16	4.18
